# Supplementary material for: Sporolactobacillus fermentans sp. nov., an obligately anaerobic and lactic acid bacterium isolated from pit mud
Source: Research Square preprint supplement (doi:10.21203/rs.3.rs-7975107/v1), 2025-11-26
Supplement: Supplementary file 1 [file 8af7d48ff73434b3c4de62ba.docx]

***Sporolactobacillus fermentans* sp. nov, an obligately anaerobic and lactic acid bacterium isolated from pit mud**

**1.1 Author names**

Guangbin Ye 1,2*, Xun Liu1,3, Caiyu Zeng1,3 and Xiang Zeng1,3,4*

1. Guangbin Ye https://orcid.org/0000-0001-8690-1579
2. Xun Liu https://orcid.org/0009-0007-9928-9527
3. Caiyu Zeng https://orcid.org/0000-0001-7033-5138
4. Xiang Zeng <https://orcid.org/0000-0001-6662-4551>

**1.2Affiliation**

1School of Food and Liquor engineering, Sichuan University of Science & Engineering, No.1, Baita Road, Sanjiang New Area, Yibin 644000, Sichuan, PR China

2Liquor Science and TechnologyKey Laboratory of Sichuan Province, Sichuan University of Science & Engineering, No.1, Baita Road, Sanjiang New Area,Yibin 644000, SiChuan, PR China

3Key Laboratory of Marine Genetic Resources, Third Institute of Oceanography, Ministry of Natural Resources, No. 184, Daxue Road, Siming District, Xiamen 361005, Fujian, PR China

4Faculty of Marine Biology, Xiamen Ocean Vocational College, Xiamen 361100, Fujian, PR China

**1.3 Corresponding author and email address**

*Ye Guangbin, guangbin1980@suse.edu.cn

*Zeng Xiang, zengxiang@tio.org.cn

**Fig S1.** Gram-stained cells of strain CQH2019T under light microscopy (a) and under transmission electron microscopy (b).

(a)Microscopy images showing Gram-positive stained cells and spores of strain CQH2019T(100-fold)

(b)Microscopy images showing cells of strain CQH2019T, transmission electron microscopy images using 6000-fold magnification.

**
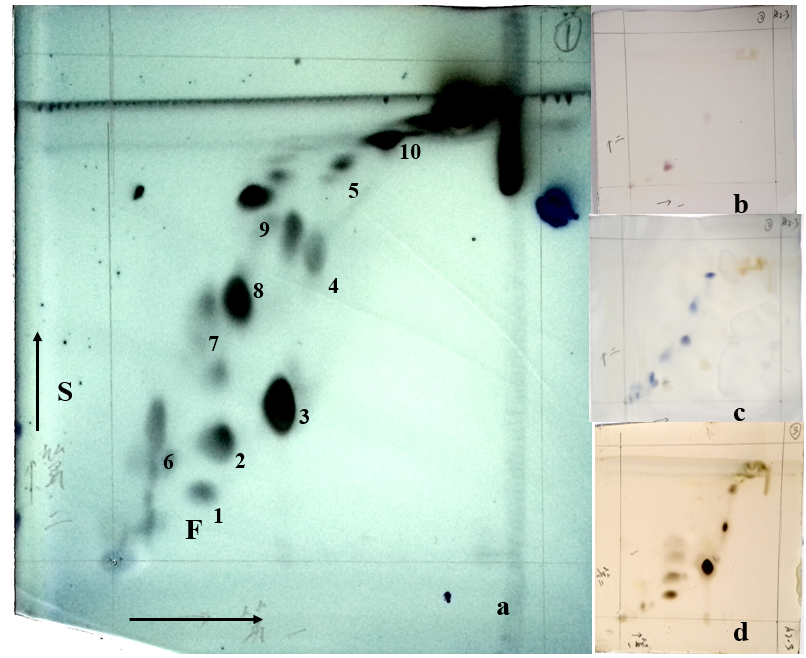
**

**Fig S2.** The major polar lipids profile of CQH2019T.

(a)10% phosphomolybdic acid staining; (b) ninhydrin staining; (c) ninhydrin-molybdenum blue staining; (d) Staining with α-naphthol reagent.

**
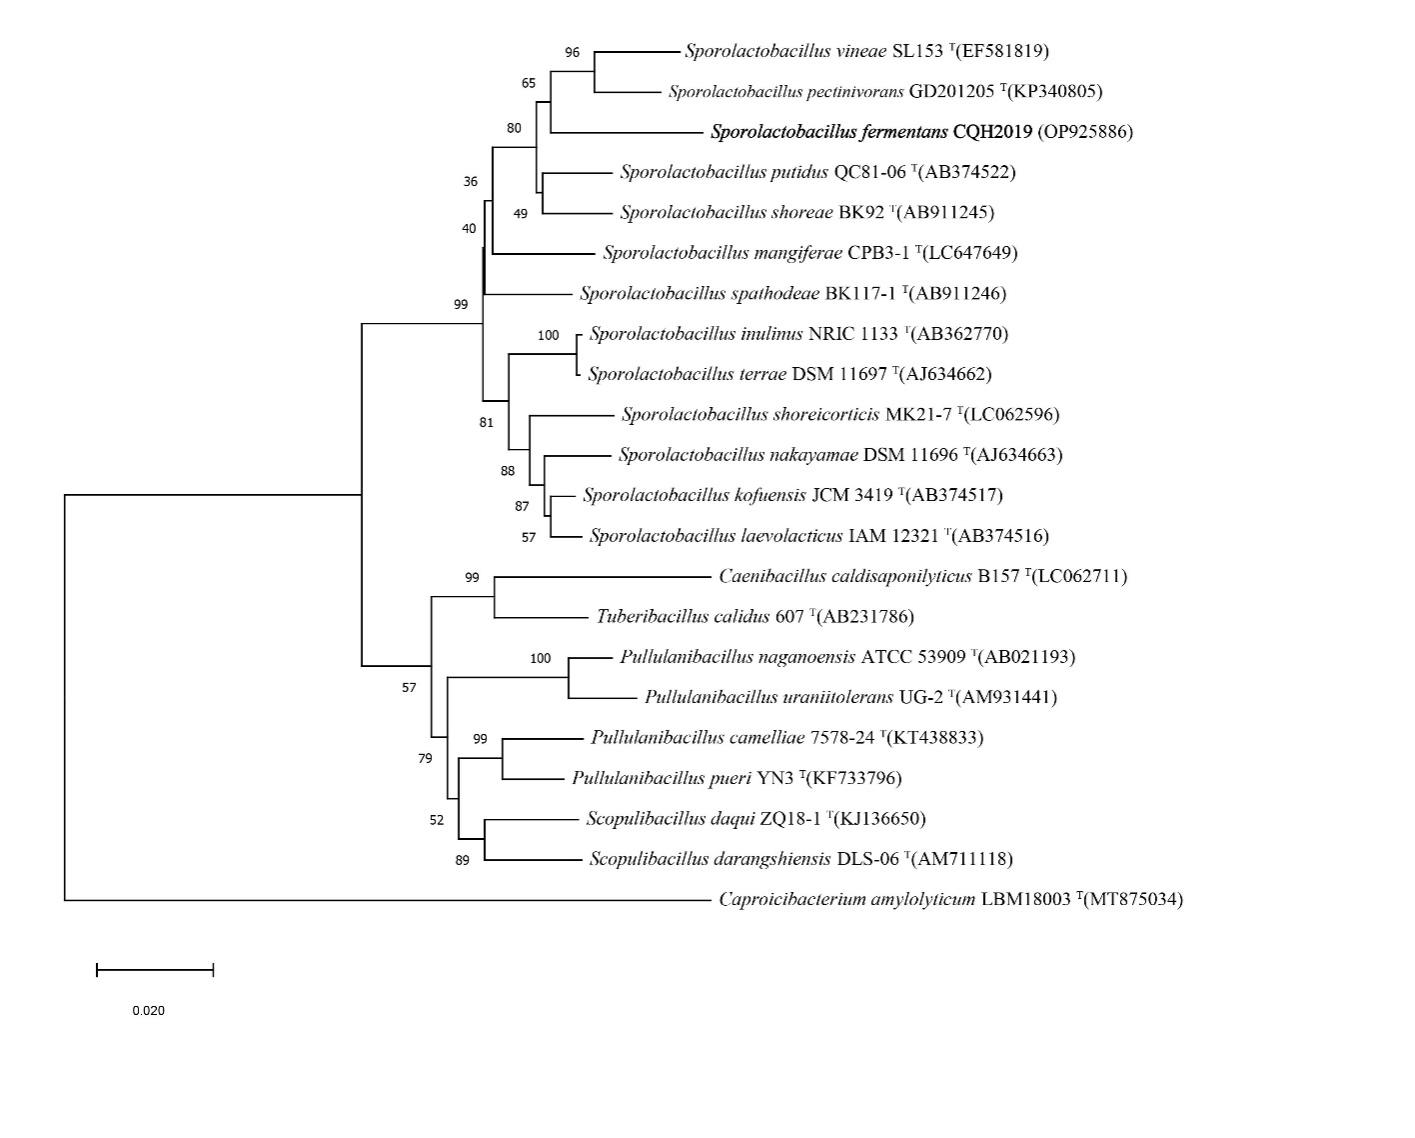
**

**Fig S3.** Phylogenetic tree (constructed using the minimum-evolution) showing the position of strain CQH2019T in the *Sporolactobacillus* cluster based on 16S rRNA gene sequences (OP925886). *Caproicibacterium amylolyticum* LBM18003T (MT875034) served as an outgroup. The numbers indicate the percentage of 1000 replicated bootstrap samplings. Bar, 0.02 substitutions per nucleotide position


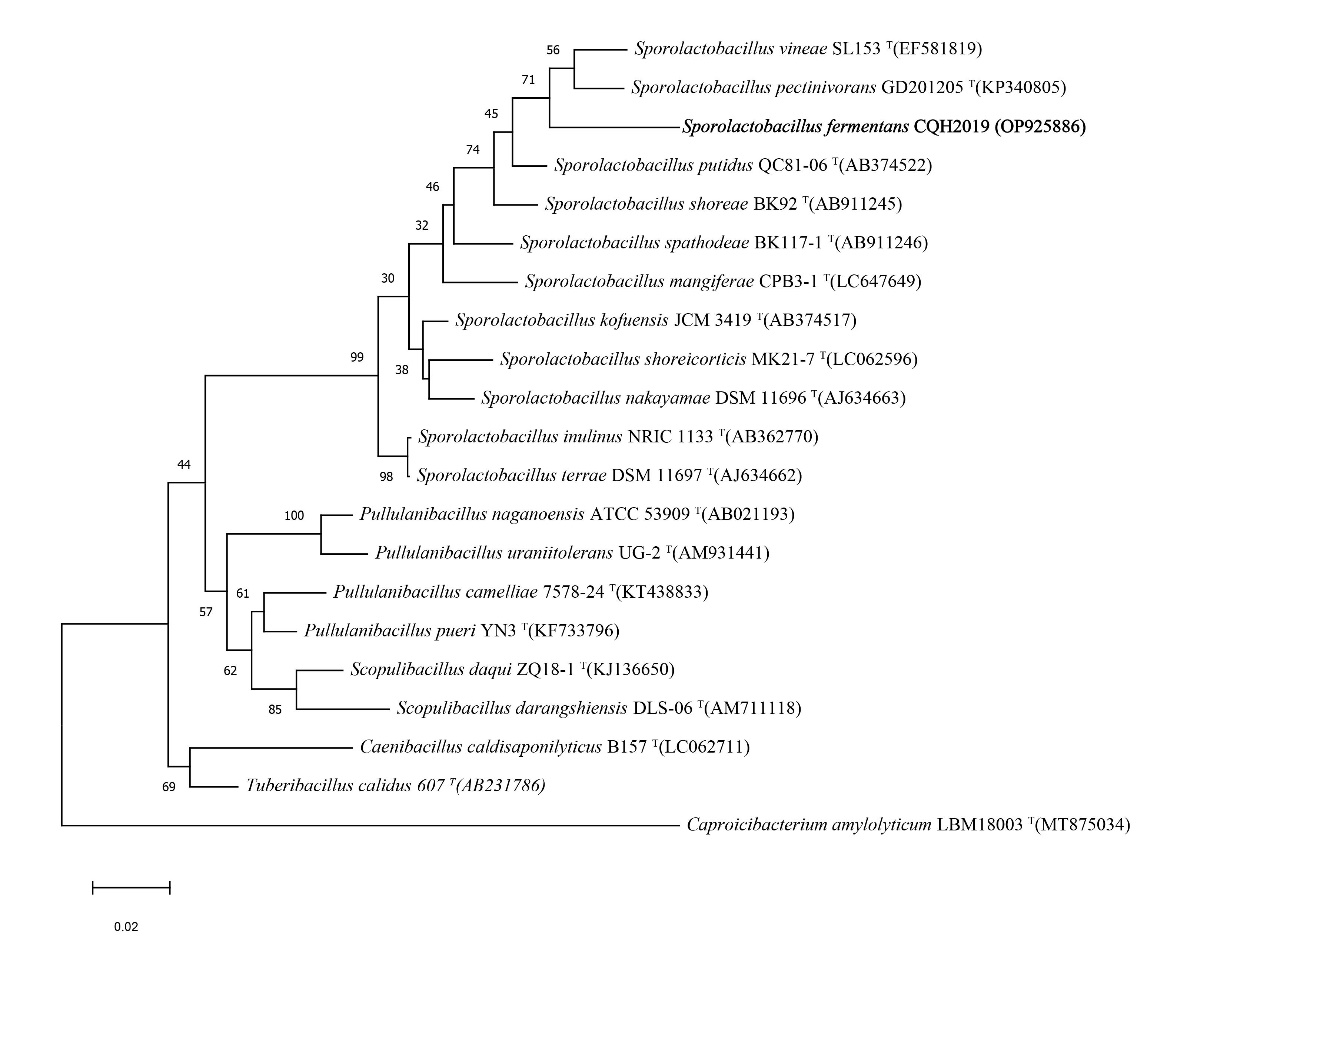


**Fig S4.** Phylogenetic tree (constructed using the maximum-likelihood) showing the position of strain CQH2019T in the *Sporolactobacillus* cluster based on 16S rRNA gene sequences (OP925886). *Caproicibacterium amylolyticum* LBM18003T (MT875034) served as an outgroup. The numbers indicate the percentage of 1000 replicated bootstrap samplings. Bar, 0.02 substitutions per nucleotide position

**Table S1.** Cellular fatty acid contents (percentages) of strain CQH2019T and type strains of related species.

Strain：1, CQH2019T; 2, *S. putidus* QC81-06 T; 3*,S. pectinivorans* GD201205T; 4, *S. vineae* SL153T; 5, *S. shoreae* BK92T

-, not detected. *, data come from(Lan, Chen, Lin, Ye, Yan, Huang, Liu, Yang, 2016);

*;** data come from (Chang, Jung, Park, Oh, 2008); *** data come from(Thamacharoensuk, Kitahara, Ohkuma, Thongchul, Tanasupawat, 2015)

| Fatty Acid | 1 | 2* | 3* | 4** | 5*** |
| --- | --- | --- | --- | --- | --- |
| C16:0 | 17.47 | 4.4 | 5.66 | 6.7 | 5.8 |
| C18:0 | 0.67 | - | 0.89 | 2.1 | - |
| C16:0ALDE | - | - | - | - | - |
| Iso-C15:0 | 5.72 | 4.2 | 12.62 | 5.2 | 4.5 |
| Iso-C16:0 | 2.76 | 5.1 | 4.90 | 3.1 | 5.0 |
| Iso-C17:0 | 2.51 | 5.1 | 4.32 | 5.8 | 3.4 |
| Antiso-C15:0 | 14.42 | 12.7 | 22.02 | 12.1 | 11.6 |
| Antiso-C17:0 | 29.95 | 65.8 | 42.23 | 61.0 | 61.5 |
| C16:1ω9c | 5.22 | - | - | - | - |

**Table S2.** Compare the 16S rRNA gene sequence similarity, genome size, DNA G+C content, average nucleotide identity (ANI), average amino acid identity (AAI), and the digital DNA-DNA hybridization (dDDH) values measured between strain CQH2019T and its closely related type strains.

| Strain | 16S similarity(%) | Genome  size(bp) | DNA G+C  content  (mol%) | ANI(%) | AAIb(%) | dDDH(%) |
| --- | --- | --- | --- | --- | --- | --- |
| CQH2019T | - | 4513405 | 47.58 | - | - | - |
| *S. putidus* QC81-06T | 95.74 | 3474957 | 47.5 | 82.58 | 82.78 | 26.8 |
| *S. vineae* SL153T | 95.74 | 3909905 | 48.7 | 71.55 | 68.42 | 19.9 |
| *S.pectinivorans* GD201205T | 95.38 | 2973984 | 50.6 | 72.41 | 70.29 | 19.9 |
| *S. shoreae* BK92T | 95.19 | 3654538 | 46.6 | 72.12 | 69.75 | 19.3 |

**Table S3.** The gene of catalase, superoxide dismutase (SOD) and peroxidase possessed by CQH2019T and its four similar species, corresponding enzyme numbers are listed in the table above. −, not detected.

| Characteristic | Catalase | Superoxide dismutase (SOD) | Peroxidase |
| --- | --- | --- | --- |
| CQH2019T | (EC 1.11.1.6) | (EC 1.15.1.2)  (EC 1.15.1.1) | (EC 1.11.1.10)  (EC 1.11.1.15) |
| *S. putidus*  QC81-06T | **-** | (EC 1.15.1.1) | (EC 1.11.1.15) |
| *S. pectinivorans* GD201205T | (EC 1.11.1.6) | (EC 1.15.1.1) | (EC 1.11.1.10)  (EC 1.11.1.15) |
| *S. vineae*  SL153T | (EC 1.11.1.6) | (EC 1.15.1.1) | (EC 1.11.1.15) |
| *S. shoreae*  BK92T | (EC 1.11.1.6) | (EC 1.15.1.1) | (EC 1.11.1.10)  (EC 1.11.1.15) |
